# Supplementary material
Source: HighWire-hosted journal article supplement (https://jnm.snmjournals.org/highwire/filestream/94716/field_highwire_adjunct_files/0/157362_Supplemental_Data.pdf)
Supplement: 157362_Supplemental_Data.pdf [file 157362_Supplemental_Data.pdf]

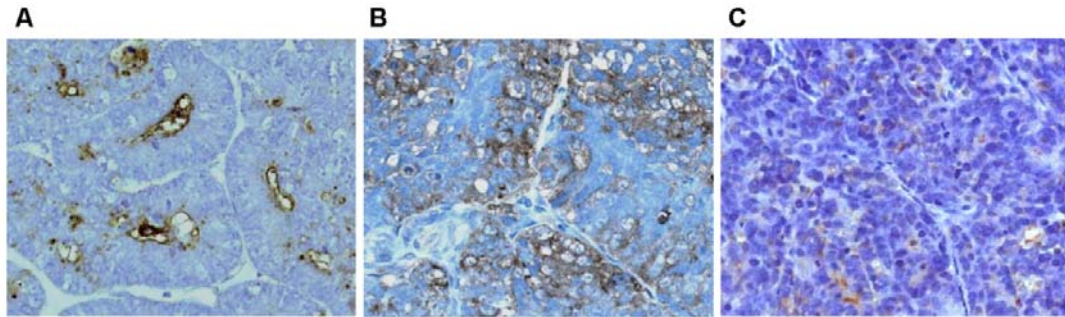

**Supplemental Figure 1.** CEA expression in subcutaneous xenografts. Representative tumor sections of (A) SW1222, (B) LoVo and (C) LS174T tumors. Images obtained at 20X magnification. Brown/red stain represents CEA expression.

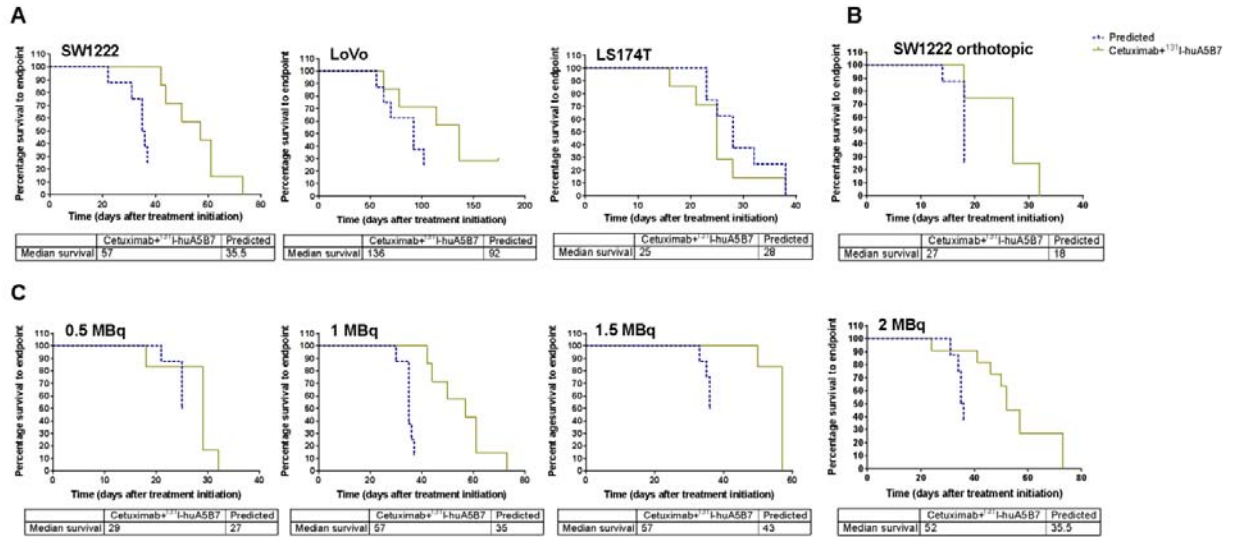

**Supplemental Figure 2.** Observed and predicted response of combined therapy on survival of mice. Synergy detected with cetuximab and <sup>131</sup>I-huA5B7 in (A) subcutaneous SW1222 and LoVo xenografts, (B) orthotopic SW1222 xenograft, treated with 1 MBq of RIT, and (C) SW1222 subcutaneous xenograft with a range of activities. The observed/actual survival of mice in response to the combination therapy was significantly longer compared with the predicted survival for all ( $p < 0.05$ , Log-rank test), except the LS174T xenograft.
